# Supplementary material for: Isotope signature characterization of Pb and U in open air by laser-ablation mass spectrometry
Source: Royal Society of Chemistry journal article supplement (doi:10.1039/c7ja00142h), 2017-01-01
Supplement: c7ja00142h1.pdf [file c7ja00142h1.pdf]

## Supporting Information

# Isotope Signature Characterization of Pb and U in Open Air by Laser-Ablation Mass Spectrometry

Yun Shen Zhou,<sup>\*,a,#</sup> Yao Lu,<sup>a,#</sup> Meng Meng Wang,<sup>a</sup> Lei Liu,<sup>a</sup> Xi Huang,<sup>a</sup> Li Jia Jiang,<sup>a</sup>

Lan Jiang,<sup>b</sup> Jean-François Silvain,<sup>c</sup> and Yong Feng Lu<sup>\*,a</sup>

<sup>a</sup>Department of Electrical and Computer Engineering, University of Nebraska-Lincoln, Lincoln,  
Nebraska 68588-0511, United States of America

<sup>b</sup>Laser Micro/Nano-Fabrication Laboratory, School of Mechanical Engineering, Beijing Institute  
of Technology, Beijing 100081, P. R. China

<sup>c</sup>Institut de Chimie de la Matière Condensée de Bordeaux – ICMCB-CNRS 87, Avenue du  
Docteur Albert Schweitzer, F-33608 Pessac Cedex, France

<sup>#</sup>These authors contributed equally to the work.

### Corresponding Author

\*Prof. Yong Feng Lu, Email: [ylu2@unl.edu](mailto:ylu2@unl.edu), Phone: +1-402-472-8323. Fax: +1-402-472-4732.

\*Prof. Yun Shen Zhou, Email: [yunshen.zhou5@gmail.com](mailto:yunshen.zhou5@gmail.com), Phone: +1-402-472-3441. Fax: +1-  
402-472-4732.

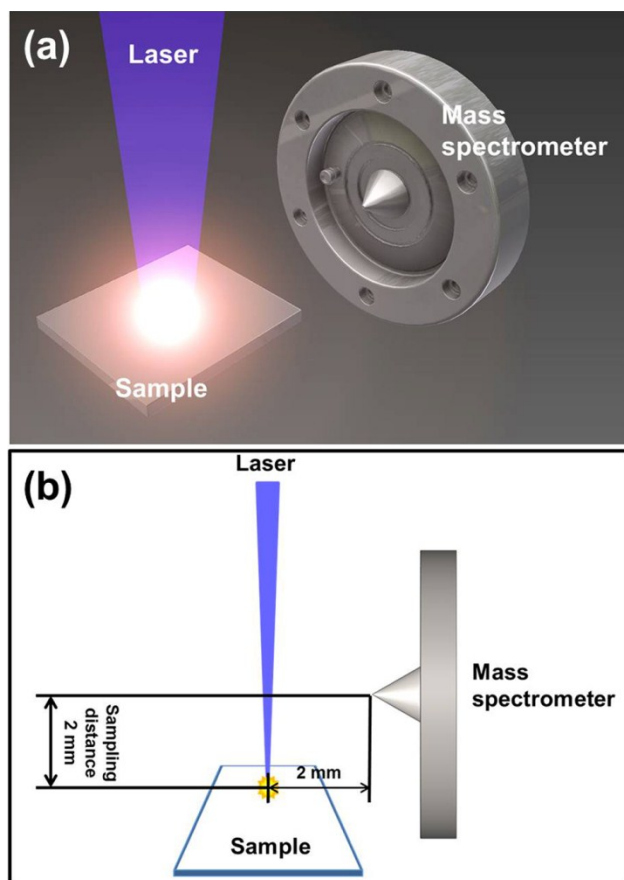

**Figure S1.** (a) Schematic of the OA-LAMS system. (b) The diagram showing the MS sampling distance.

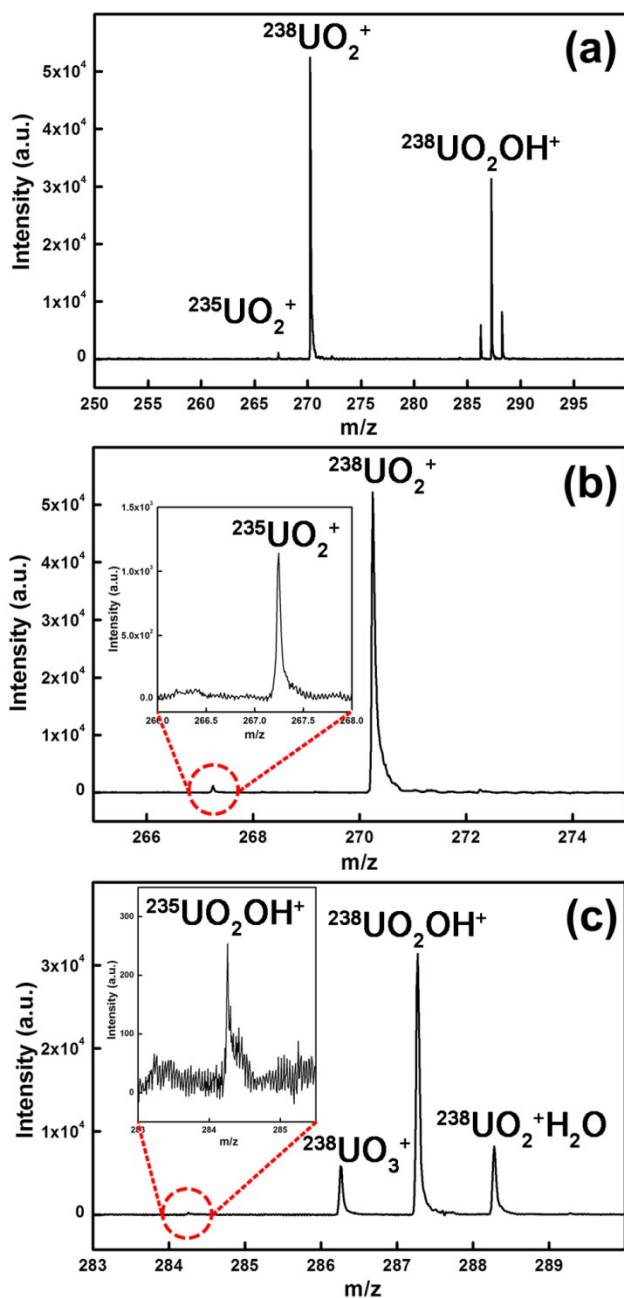

**Figure S2.** (a) A typical OA-LAMS spectrum of the U-C sample at the positive ion mode. (b) A zoomed-in view showing <sup>235</sup>UO<sub>2</sub><sup>+</sup> and <sup>238</sup>UO<sub>2</sub><sup>+</sup>. (c) A zoomed-in view showing <sup>235</sup>UO<sub>2</sub>OH<sup>+</sup> and <sup>238</sup>UO<sub>2</sub>OH<sup>+</sup>. Due to its low abundance, <sup>235</sup>U signals were barely visible in Figure S2a. Corresponding zoomed-in spectra were shown in Figures S2b and S2c, in which <sup>235</sup>UO<sub>2</sub><sup>+</sup> and <sup>235</sup>UO<sub>2</sub>OH<sup>+</sup> were discerned at 267 and 284, respectively.

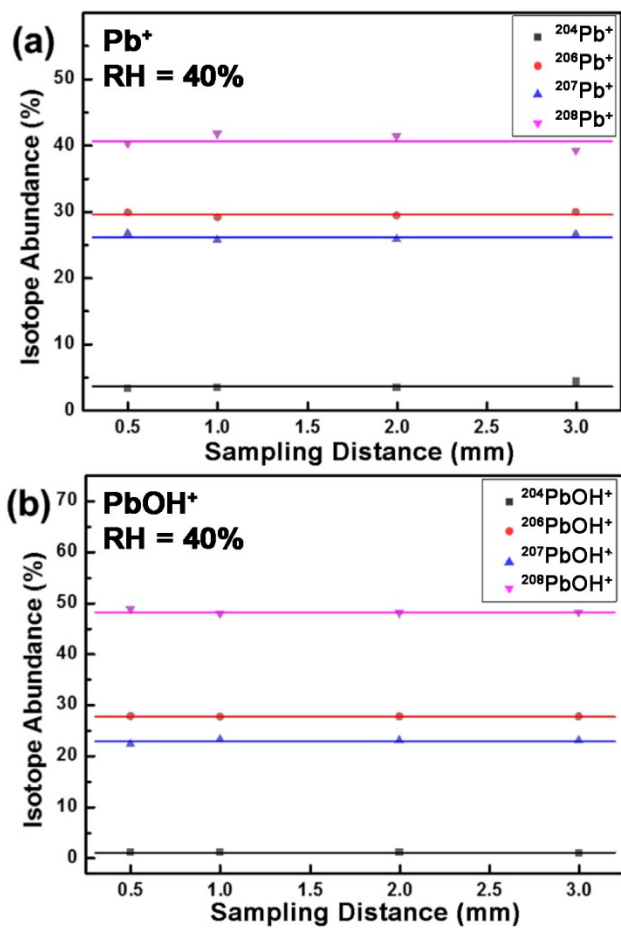

**Figure S3.** Dependence of the Pb isotope abundance on the sampling distance retrieved from (a) Pb<sup>+</sup> and (b) PbOH<sup>+</sup>.
